# Supplementary material for: Revealing stable processing products from ribosome-associated small RNAs by deep-sequencing data analysis
Source: PubMed Central journal article supplement — Nucleic Acids Res. 2012 Jan 20;40(9):4013–24. doi: 10.1093/nar/gks020 (PMC3351166; doi:10.1093/nar/gks020), 2012-01-20
Supplement: supp_gks020_nar-02647-n-2011-File007.pdf [file supp_gks020_nar-02647-n-2011-File007.pdf]

## Supplementary Information

# **Revealing stable processing products from ribosome-associated small RNAs by deep-sequencing data analysis**

Marek Zywicki<sup>1\*</sup>, Kamilla Bakowska-Zywicka<sup>1</sup> and Norbert Polacek<sup>1,2\*</sup>

<sup>1</sup>Innsbruck Biocenter, Medical University Innsbruck, Division of Genomics and RNomics, Fritz-Pregl-Strasse 3, 6020 Innsbruck, Austria, and <sup>2</sup>Department of Chemistry and Biochemistry, University of Bern, Freiestrasse 3, 3012 Bern, Switzerland

\*Correspondence should be addressed to M.Z. ([marek.zywicki@i-med.ac.at](mailto:marek.zywicki@i-med.ac.at)) or N.P. ([norbert.polacek@i-med.ac.at](mailto:norbert.polacek@i-med.ac.at))

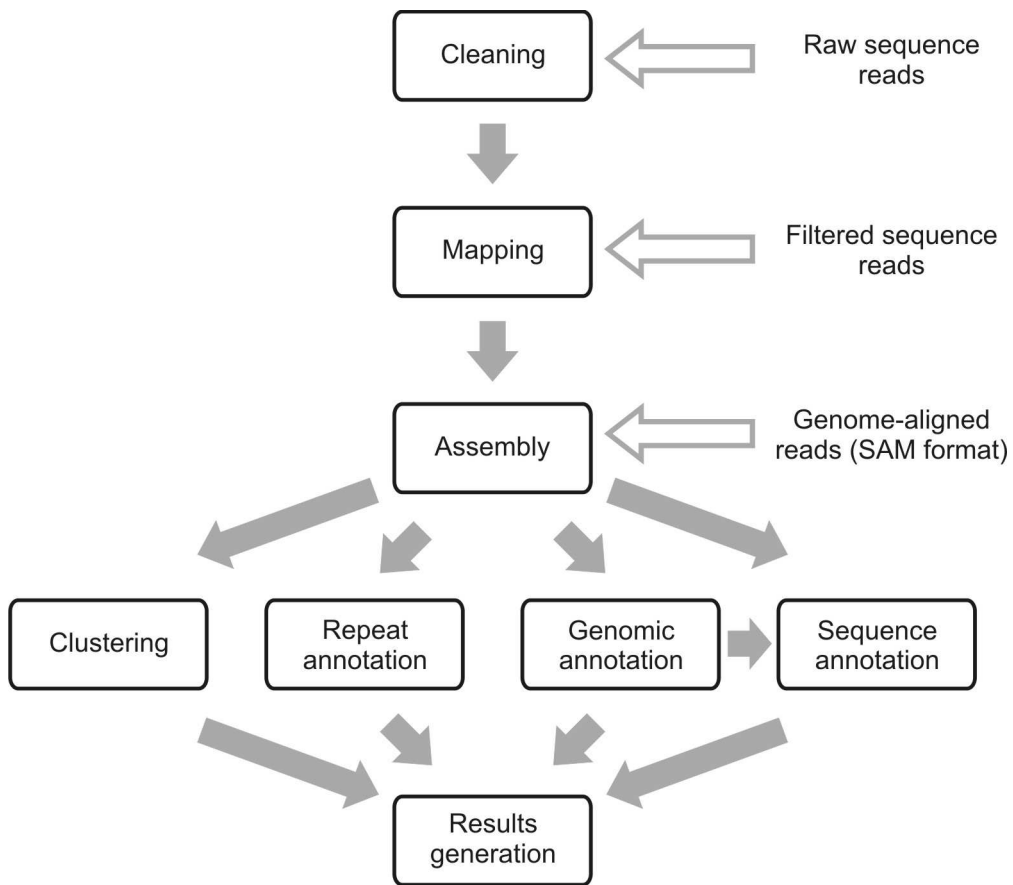

**Supplementary Figure 1**

A workflow of the APART pipeline. Subsequent steps of the analysis are shown and the information flow is indicated with the filled arrows. Three possible entry points for the analysis are indicated with open arrows.



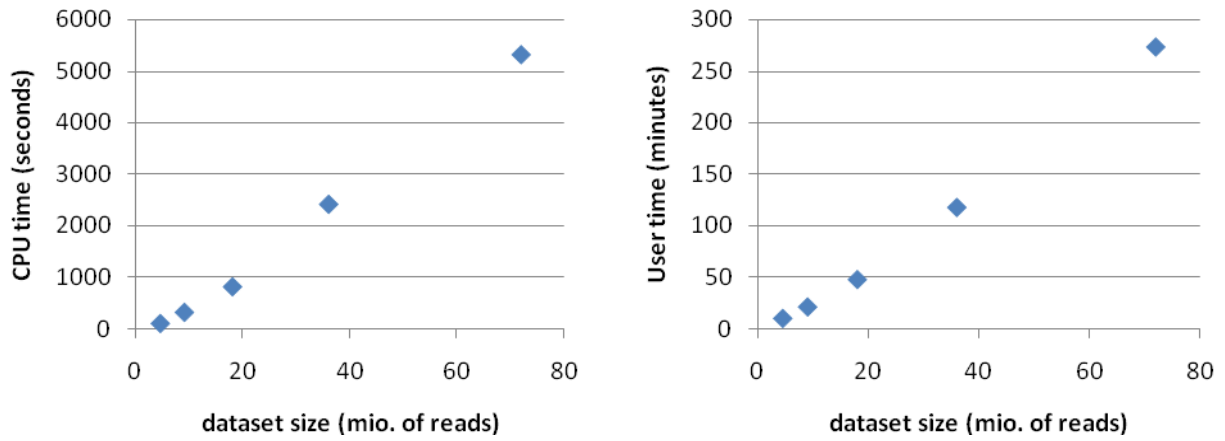

### Supplementary Figure 3

Dependence of the APART running times on input read numbers. **A)** CPU time course **B)** User time course. In both cases the time increase is linear.

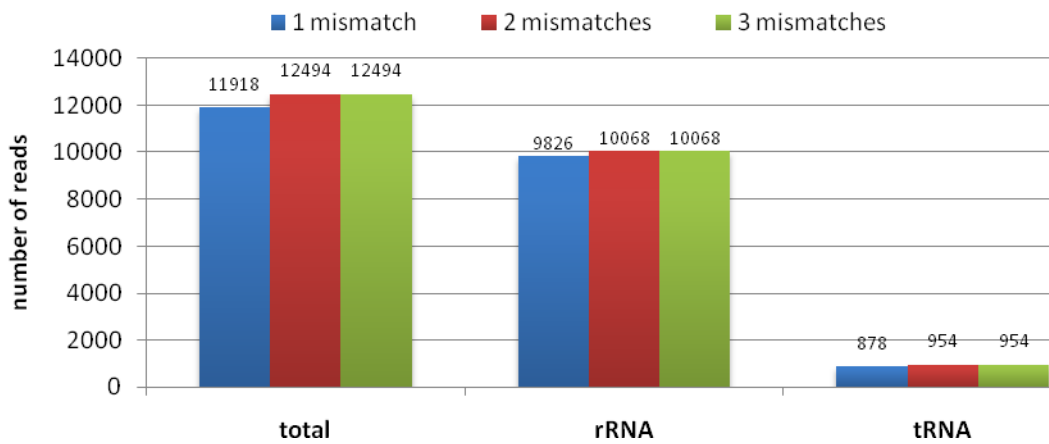

### Supplementary Figure 4

Comparison of number of reads aligning to the reference genome by using different number of mismatches allowed. Two known hyper-modified types of ncRNA transcripts (rRNA, tRNA) are shown. The gain of reads in case of rRNA and tRNA by allowing more mismatches is comparable to total gain of alignments (total), suggesting that in yeast RNA modifications do not influence the mapping procedure.
